# Supplementary material for: Practice modality of motor sequences impacts the neural signature of motor imagery
Source: Sci Rep. 2020 Nov 5;10:19176. doi: 10.1038/s41598-020-76214-y (PMC7645615; doi:10.1038/s41598-020-76214-y)
Supplement: Supplementary file 4 — Supplementary Table S3. [file 41598_2020_76214_MOESM4_ESM.docx]

Practice modality of motor sequences impacts the neural signature of motor imagery

Britta Krüger1, Meike Hettwer2, Adam Zabicki1, Benjamin de Haas4,

Jörn Munzert1, and Karen Zentgraf*3

1Institute for Sports Science, Justus Liebig University Giessen, Germany

2Max Planck School of Cognition, Leipzig, Germany

3Institute of Sport Sciences, Goethe University Frankfurt, Germany

4Experimental Psychology, Justus Liebig University Giessen, Germany

Table S3:

|  | Left/Right | | Coordinates of max. *t* value | | | *t* value |  | | |
| --- | --- | --- | --- | --- | --- | --- | --- | --- | --- |
| *Physical vs. Rest* | |  |  |  |  |  |  | | |
| Superior parietal gyrus (7A) | | L | -18 | -64 | 62 | 8.03 |  | | |
| Precentral gyrus | | L | -54 | -1 | 47 | 7.39 |  | | |
|  | |  |  |  |  |  |  | | |
| *Mental vs. Rest* | |  |  |  |  |  |  | | |
| Superior parietal gyrus (7A) | | L | -18 | -64 | 62 | 7.84 |  | | |
| Cuneus | | R | 18 | -97 | 8 | 6.75 |  | | |
|  | |  |  |  |  |  |  | | |
| *Control vs. Rest* | |  |  |  |  |  |  | | |
| Superior parietal gyrus (7A) | | L | -18 | -64 | 62 | 8.24 |  | | |
| Precentral gyrus | | L | -51 | -4 | 47 | 7.13 |  | | |
|  |  | |  |  |  |  |  | | |
| *Note.* MNI coordinates. Cluster size > 20, *p*<.05 (FWE-corrected). | | | | | | |  | | |
|  |  | |  | | |  | |
|  |  | |  |  |  |  | |
| *Physical vs. Mental* | | | |  |  |  | |  |
| Cerebellum VIIb | R | | 22 | -76 | -49 | 4.93 | |  |
| Cerebellum VIIIa | L | | -32 | -44 | -42 | 3.80 | |  |
|  |  | |  |  |  |  | |  |
| *Mental vs. Physical* | | | |  |  |  | |  |
| *No supra-threshold clusters* |  | |  |  |  |  | |  |
|  |  | |  |  |  |  | |  |
| *Physical vs. Control* | | | |  |  |  | |
| Precentral gyrus | | L | -42 | -10 | 44 | 5,41 | |
| Area hOc4v (V4) | | R | 42 | -73 | -16 | 5,27 | |
| Cuneus | | R | 12 | -85 | 41 | 5,14 | |
| Superior parietal cortex (7P) | | L | -3 | -85 | 38 | 4,63 | |
| Area hOc4la | | L | -51 | -79 | 8 | 4,90 | |
| Area TE 1.1 | | R | 36 | -28 | 8 | 4,88 | |
| Area hOc3v (V3) | | R | 30 | -94 | -13 | 4,68 | |
| Area hOc4lp | | R | 45 | -85 | -4 | 4,27 | |
| Area hOc4la | | R | 57 | -67 | 2 | 4,10 | |
| Precentral gyrus | | R | 24 | -22 | 74 | 4,61 | |
| Area TE3 | | L | -63 | -31 | 17 | 4,49 | |  |
| Area FG3 | | L | -33 | -61 | -10 | 4,34 | |  |
| Lingual gyrus | | L | -21 | -61 | -10 | 4,19 | |  |
| Precentral gyrus | | L | -24 | -22 | 71 | 4,32 | |  |
| Paracentral Lobe | | L | -15 | -19 | 77 | 4,01 | |  |
| Area 4a | | R | 9 | -31 | 56 | 4,06 | |  |
| Cerebellum VIIa | | R | 44 | -68 | -45 | 3,37 | |  |
|  | |  |  |  |  |  | |  |
| *Mental vs. Control* | |  |  |  |  |  | |  |
| Area FG3 | | L | -33 | -55 | -16 | 4,71 | |  |
| Area FG1 | | L | -33 | -76 | -7 | 4,44 | |  |
| Area hOc4la | | L | -36 | -79 | 2 | 3,90 | |  |
| Area hOc4v (V4) | | R | 39 | -76 | -10 | 4,51 | |  |
| Superior temporal gyrus | | R | -51 | -4 | -13 | 4,24 | |  |
| Putamen | | L | -27 | -10 | -1 | 3,94 | |  |
|  |  | |  |  |  |  | |  |
| *Note.* MNI coordinates. Cluster size > 20, *p* < .001 (uncorrected). | | | | | | | |  |
