# Supplementary material for: Practice modality of motor sequences impacts the neural signature of motor imagery
Source: Sci Rep. 2020 Nov 5;10:19176. doi: 10.1038/s41598-020-76214-y (PMC7645615; doi:10.1038/s41598-020-76214-y)
Supplement: Supplementary file 5 — Supplementary Table S4. [file 41598_2020_76214_MOESM5_ESM.docx]

**Table S4**. Additional subject characteristics.

Practice modality of motor sequences impacts the neural signature of motor imagery

Britta Krüger1, Meike Hettwer2, Adam Zabicki1, Benjamin de Haas4,

Jörn Munzert1, and Karen Zentgraf*3

1Institute for Sports Science, Justus Liebig University Giessen, Germany

2Max Planck School of Cognition, Leipzig, Germany

3Institute of Sport Sciences, Goethe University Frankfurt, Germany

4Experimental Psychology, Justus Liebig University Giessen, Germany

|  | **Mean (SD)** |
| --- | --- |
| **Cognitive tests** |  |
| KAI-N  ZVT  d2-R | 141.0 (20.9)  115.5 (9.40)  113.5 (12.2) |
| **VMIQ-2**  *Pre intervention* |  |
| External visual imagery  Internal visual imagery  Kinaesthetic imagery | 2.22 (0.73)  1.83 (0.53)  2.20 (0.68) |
| *Post intervention* |  |
| External visual imagery  Internal visual imagery  Kinaesthetic imagery | 2.07 (0.60)  1.70 (0.49)  2.13 (0.48) |

KAI-N: Lehrl & Blaha (2004); ZVT: Oswald & Roth (1987);
d2-R: Brickenkamp, Schmidt-Atzert & Liepmann (2010);
VMIQ-2: Roberts, Callow, Hardy, Markland & Bringer (2008)
